# Supplementary material for: Comparative Effectiveness of Device-Aided Therapies on Quality of Life and Off-Time in Advanced Parkinson’s Disease: A Systematic Review and Bayesian Network Meta-analysis
Source: PubMed Central journal article supplement — CNS Drugs. 2022 Nov 21;36(12):1269–83. doi: 10.1007/s40263-022-00963-9 (PMC9712309; doi:10.1007/s40263-022-00963-9), 2022-11-21
Supplement: 40263_2022_963_MOESM1_ESM.pdf [file 40263_2022_963_MOESM1_ESM.pdf]

**Comparative effectiveness of device-aided therapies on quality of life and off-time in advanced Parkinson's disease: a systematic review and Bayesian network meta-analysis**

Angelo Antonini<sup>1</sup> ( <https://orcid.org/0000-0003-1040-2807>), Rajesh Pahwa<sup>2</sup> ( <https://orcid.org/0000-0003-3176-6466>), Per Odin<sup>3</sup> ( <https://orcid.org/0000-0002-0756-7478>), Stuart H. Isaacson<sup>4</sup> ( <https://orcid.org/0000-0002-9914-5706>), Aristide Merola<sup>5</sup> ( <https://orcid.org/0000-0002-5587-726X>), Lin Wang,<sup>6,7</sup> Prasanna L. Kandukuri,<sup>6</sup> Ali Alobaidi<sup>6,8</sup> ( <https://orcid.org/0000-0002-0720-7894>), Connie H. Yan ( <https://orcid.org/0000-0003-1467-4666>),<sup>6,8</sup> Yanjun Bao,<sup>6</sup> Cindy Zadikoff,<sup>6</sup> Juan Carlos Parra<sup>6</sup> ( <https://orcid.org/0000-0002-5613-6121>), Lars Bergmann,<sup>6</sup> K. Ray Chaudhuri<sup>9</sup> ( <https://orcid.org/0000-0003-2815-0505>)

<sup>1</sup>*Parkinson and Movement Disorders Unit, Department of Neuroscience, University of Padova, Padova, Italy*

<sup>2</sup>*University of Kansas Medical Center, Kansas City, KS, USA*

<sup>3</sup>*University of Lund, Lund, Sweden*

<sup>4</sup>*Parkinson's Disease and Movement Disorders Center, Boca Raton, FL, USA*

<sup>5</sup>*The Ohio State University Wexner Medical Center, Department of Neurology, Columbus, OH, USA*

<sup>6</sup>*AbbVie Inc., North Chicago, IL, USA*

<sup>7</sup>*Johns Hopkins School of Public Health, Baltimore, MD, USA*

<sup>8</sup>*University of Illinois at Chicago, Chicago, IL, USA*

<sup>9</sup>*King's College and Parkinson Foundation Centre of Excellence, Kings College Hospital London, London, UK*

**Corresponding author:**

Angelo Antonini ( <https://orcid.org/0000-0003-1040-2807>)

Parkinson and Movement Disorders Unit

Department of Neuroscience

University of Padova

35128 Padova

Italy

Email: [Angelo.antonini@unipd.it](mailto:Angelo.antonini@unipd.it)

**Supplementary Table 1** Search strategy for the Medline and Embase databases

| <i>Search Term</i>                                                                                                                                                                                                                                                                                                                                                                                                                                                                                                                                                                                                                                                                                                                                                               |
|----------------------------------------------------------------------------------------------------------------------------------------------------------------------------------------------------------------------------------------------------------------------------------------------------------------------------------------------------------------------------------------------------------------------------------------------------------------------------------------------------------------------------------------------------------------------------------------------------------------------------------------------------------------------------------------------------------------------------------------------------------------------------------|
| 1 Parkinson\$ disease.mp.                                                                                                                                                                                                                                                                                                                                                                                                                                                                                                                                                                                                                                                                                                                                                        |
| 2 exp Parkinson Disease/                                                                                                                                                                                                                                                                                                                                                                                                                                                                                                                                                                                                                                                                                                                                                         |
| 3 1 or 2                                                                                                                                                                                                                                                                                                                                                                                                                                                                                                                                                                                                                                                                                                                                                                         |
| 4 Deep brain stimulation/                                                                                                                                                                                                                                                                                                                                                                                                                                                                                                                                                                                                                                                                                                                                                        |
| 5 (deep brain stimulation or dbs or subthalamic stimulation or pallidal stimulation or ventral intermediate nucleus stimulation or thalamic stimulation).ti,ab.                                                                                                                                                                                                                                                                                                                                                                                                                                                                                                                                                                                                                  |
| 6 (4 or 5) and 3                                                                                                                                                                                                                                                                                                                                                                                                                                                                                                                                                                                                                                                                                                                                                                 |
| 7 limit 6 to English language                                                                                                                                                                                                                                                                                                                                                                                                                                                                                                                                                                                                                                                                                                                                                    |
| 8 limit 7 to yr="2003 -Current"                                                                                                                                                                                                                                                                                                                                                                                                                                                                                                                                                                                                                                                                                                                                                  |
| 9 exp "cost"/ or exp "cost benefit analysis"/                                                                                                                                                                                                                                                                                                                                                                                                                                                                                                                                                                                                                                                                                                                                    |
| 10 (animals not humans).sh.                                                                                                                                                                                                                                                                                                                                                                                                                                                                                                                                                                                                                                                                                                                                                      |
| 11 (Clinical Conference or Consensus Development Conference or In Vitro or Meta-Analysis or Scientific Integrity Review or Twin Study or "Clinical Trial, Phase I" or Letter or News or Patient Education Handout or Review or Introductory Journal Article or Guideline or Practice Guideline or book or conference paper or editorial or letter or review or "journal: conference abstract" or short survey).pt.                                                                                                                                                                                                                                                                                                                                                               |
| 12 (book or book series or conference paper or conference proceeding or "conference review" or editorial or letter or note or "review" or trade journal or addresses or autobiography or bibliography or biography or clinical conference or clinical trial, phase i or comment or congresses or consensus development conference or consensus development conference, nih or dictionary or directory or guideline or in vitro or interactive tutorial or interview or introductory journal article or lectures or legal cases or legislation or meta analysis or news or newspaper article or patient education handout or periodical index or practice guideline or "scientific integrity review" or systematic reviews or twin study or video-audio media or webcasts).pt,sh. |
| 13 8 not (9 or 10 or 11 or 12)                                                                                                                                                                                                                                                                                                                                                                                                                                                                                                                                                                                                                                                                                                                                                   |
| 14 case reports.pt.                                                                                                                                                                                                                                                                                                                                                                                                                                                                                                                                                                                                                                                                                                                                                              |
| 15 case report/                                                                                                                                                                                                                                                                                                                                                                                                                                                                                                                                                                                                                                                                                                                                                                  |
| 16 13 not (14 or 15)                                                                                                                                                                                                                                                                                                                                                                                                                                                                                                                                                                                                                                                                                                                                                             |
| 17 Apomorphine/ or apomorphine.ti,ab,nm.                                                                                                                                                                                                                                                                                                                                                                                                                                                                                                                                                                                                                                                                                                                                         |
| 18 Infusion Pumps/                                                                                                                                                                                                                                                                                                                                                                                                                                                                                                                                                                                                                                                                                                                                                               |
| 19 (infusion\$ or pump\$ or infuse).ti,ab.                                                                                                                                                                                                                                                                                                                                                                                                                                                                                                                                                                                                                                                                                                                                       |
| 20 17 and (18 or 19)                                                                                                                                                                                                                                                                                                                                                                                                                                                                                                                                                                                                                                                                                                                                                             |
| 21 20 and 3                                                                                                                                                                                                                                                                                                                                                                                                                                                                                                                                                                                                                                                                                                                                                                      |
| 22 limit 21 to English language                                                                                                                                                                                                                                                                                                                                                                                                                                                                                                                                                                                                                                                                                                                                                  |
| 23 limit 22 to yr="2003 -Current"                                                                                                                                                                                                                                                                                                                                                                                                                                                                                                                                                                                                                                                                                                                                                |
| 24 (book or book series or conference paper or conference proceeding or "conference review" or editorial or letter or note or "review" or trade journal or addresses or autobiography or bibliography or biography or clinical conference or clinical trial, phase i or comment or congresses or consensus development conference or consensus development conference, nih or dictionary or directory or guideline or in vitro or interactive tutorial or                                                                                                                                                                                                                                                                                                                        |

|                                                                                                                                                                                                                                                                                                                                                                                                                                                                                                                                                                                                                                                                                                                                                                                  |
|----------------------------------------------------------------------------------------------------------------------------------------------------------------------------------------------------------------------------------------------------------------------------------------------------------------------------------------------------------------------------------------------------------------------------------------------------------------------------------------------------------------------------------------------------------------------------------------------------------------------------------------------------------------------------------------------------------------------------------------------------------------------------------|
| interview or introductory journal article or lectures or legal cases or legislation or meta analysis or news or newspaper article or patient education handout or periodical index or practice guideline or "scientific integrity review" or systematic reviews or twin study or video-audio media or webcasts).pt,sh.                                                                                                                                                                                                                                                                                                                                                                                                                                                           |
| 25 23 not (24 or 9 or 10 or 11)                                                                                                                                                                                                                                                                                                                                                                                                                                                                                                                                                                                                                                                                                                                                                  |
| 26 case reports.pt.                                                                                                                                                                                                                                                                                                                                                                                                                                                                                                                                                                                                                                                                                                                                                              |
| 27 25 not (26 or 15)                                                                                                                                                                                                                                                                                                                                                                                                                                                                                                                                                                                                                                                                                                                                                             |
| 28 duodopa.ti,ab,nm. or ((levodopa.ti,ab,nm. or levodopa/) and (carbidopa.ti,ab,nm. or carbidopa/)) or Duodopa/ or "carbidopa plus levodopa"/ or duodenal levodopa.ti,ab.                                                                                                                                                                                                                                                                                                                                                                                                                                                                                                                                                                                                        |
| 29 (intestin\$ or jejun\$ or duoden\$ or intrainestin\$ or intrajejun\$ or intraduoden\$).ti,ab.                                                                                                                                                                                                                                                                                                                                                                                                                                                                                                                                                                                                                                                                                 |
| 30 28 and 29                                                                                                                                                                                                                                                                                                                                                                                                                                                                                                                                                                                                                                                                                                                                                                     |
| 31 30 and 3                                                                                                                                                                                                                                                                                                                                                                                                                                                                                                                                                                                                                                                                                                                                                                      |
| 32 limit 31 to English language                                                                                                                                                                                                                                                                                                                                                                                                                                                                                                                                                                                                                                                                                                                                                  |
| 33 limit 32 to yr="2003 -Current"                                                                                                                                                                                                                                                                                                                                                                                                                                                                                                                                                                                                                                                                                                                                                |
| 34 (book or book series or conference paper or conference proceeding or "conference review" or editorial or letter or note or "review" or trade journal or addresses or autobiography or bibliography or biography or clinical conference or clinical trial, phase i or comment or congresses or consensus development conference or consensus development conference, nih or dictionary or directory or guideline or in vitro or interactive tutorial or interview or introductory journal article or lectures or legal cases or legislation or meta analysis or news or newspaper article or patient education handout or periodical index or practice guideline or "scientific integrity review" or systematic reviews or twin study or video-audio media or webcasts).pt,sh. |
| 35 33 not (34 or 9 or 10 or 11)                                                                                                                                                                                                                                                                                                                                                                                                                                                                                                                                                                                                                                                                                                                                                  |
| 36 case reports.pt.                                                                                                                                                                                                                                                                                                                                                                                                                                                                                                                                                                                                                                                                                                                                                              |
| 37 35 not (36 or 15)                                                                                                                                                                                                                                                                                                                                                                                                                                                                                                                                                                                                                                                                                                                                                             |
| 38 16 or 27 or 37                                                                                                                                                                                                                                                                                                                                                                                                                                                                                                                                                                                                                                                                                                                                                                |
| 39 remove duplicates from 38                                                                                                                                                                                                                                                                                                                                                                                                                                                                                                                                                                                                                                                                                                                                                     |
| 40 3 and (4 or 5 or 20 or 30)                                                                                                                                                                                                                                                                                                                                                                                                                                                                                                                                                                                                                                                                                                                                                    |
| 41 limit 40 to (meta analysis or systematic reviews) [Limit not valid in Embase; records were retained]                                                                                                                                                                                                                                                                                                                                                                                                                                                                                                                                                                                                                                                                          |
| 42 ((literature adj3 review\$) or (systematic\$ adj2 (review\$ or overview))).ti,ab. or exp "Systematic Review"/                                                                                                                                                                                                                                                                                                                                                                                                                                                                                                                                                                                                                                                                 |
| 43 (meta?anal\$ or meta anal\$ or meta-anal\$ or metaanal\$ or metanal\$).ti,ab. or exp meta analysis/ or meta-analysis.pt,sh.                                                                                                                                                                                                                                                                                                                                                                                                                                                                                                                                                                                                                                                   |
| 44 40 and (42 or 43)                                                                                                                                                                                                                                                                                                                                                                                                                                                                                                                                                                                                                                                                                                                                                             |
| 45 41 or 44                                                                                                                                                                                                                                                                                                                                                                                                                                                                                                                                                                                                                                                                                                                                                                      |
| 46 limit 45 to English language                                                                                                                                                                                                                                                                                                                                                                                                                                                                                                                                                                                                                                                                                                                                                  |
| 47 remove duplicates from 46                                                                                                                                                                                                                                                                                                                                                                                                                                                                                                                                                                                                                                                                                                                                                     |
| 48 limit 47 to yr="2008 -Current"                                                                                                                                                                                                                                                                                                                                                                                                                                                                                                                                                                                                                                                                                                                                                |
| 49 39 or 48                                                                                                                                                                                                                                                                                                                                                                                                                                                                                                                                                                                                                                                                                                                                                                      |

## Search strategy for the Cochrane Library

| Search # | Search Term                                                                                                                                          |
|----------|------------------------------------------------------------------------------------------------------------------------------------------------------|
| #1       | MeSH descriptor: [Parkinson Disease] explode all trees                                                                                               |
| #2       | Parkinson* disease                                                                                                                                   |
| #3       | #1 or #2                                                                                                                                             |
| #4       | MeSH descriptor: [Deep Brain Stimulation] explode all trees                                                                                          |
| #5       | deep brain stimulation or dbs or subthalamic stimulation or pallidal stimulation or ventral intermediate nucleus stimulation or thalamic stimulation |
| #6       | (#4 or #5) and #3 from 2003, in Trials                                                                                                               |
| #7       | MeSH descriptor: [Apomorphine] explode all trees                                                                                                     |
| #8       | apomorphine                                                                                                                                          |
| #9       | MeSH descriptor: [Infusion Pumps] explode all trees                                                                                                  |
| #10      | infusion* or pump* or infuse                                                                                                                         |
| #11      | (#7 or #8) and (#9 or #10)                                                                                                                           |
| #12      | #11 and #3 from 2003, in Trials                                                                                                                      |
| #13      | duodopa or (levodopa and carbidopa)                                                                                                                  |
| #14      | MeSH descriptor: [Levodopa] explode all trees                                                                                                        |
| #15      | MeSH descriptor: [Carbidopa] explode all trees                                                                                                       |
| #16      | #14 and #15                                                                                                                                          |
| #17      | intestin* or jejun* or duoden*                                                                                                                       |
| #18      | (#13 or #16) and #17                                                                                                                                 |
| #19      | #18 and #3 from 2003, in Trials                                                                                                                      |
| #20      | #6 or #12 or #19 from 2003, in Trials                                                                                                                |
| #21      | (#4 or #5) and #3                                                                                                                                    |
| #22      | #11 and #3                                                                                                                                           |
| #23      | #18 and #3                                                                                                                                           |
| #24      | #21 or #22 or #23 from 2008, in Cochrane Reviews (Reviews and Protocols) and Other Reviews                                                           |
| #25      | #20 or #24                                                                                                                                           |

## Search strategy for the PubMed database

| Search # | Search Term                                                                |
|----------|----------------------------------------------------------------------------|
| #1       | Search (Parkinson*[Title/Abstract] OR "paralysis agitans"[Title/Abstract]) |
| #2       | Search "parkinson disease"[MeSH Terms]                                     |

|     |                                                                                                                                                                                                                                                                                                                                                                                                                                                                                                    |
|-----|----------------------------------------------------------------------------------------------------------------------------------------------------------------------------------------------------------------------------------------------------------------------------------------------------------------------------------------------------------------------------------------------------------------------------------------------------------------------------------------------------|
| #3  | Search (("brain excitation"[Title/Abstract] OR "brain stimulation"[Title/Abstract] OR "brain stimulus"[Title/Abstract] OR "deep brain stimulation"[Title/Abstract] OR "electrical brain stimulation"[Title/Abstract] OR "excitation,brain"[Title/Abstract] OR "brain depth stimulation"[Title/Abstract] OR "Brain Stimulation, Deep"[Title/Abstract] OR ("Electrical Stimulation"[Title/Abstract] AND Brain)[Title/Abstract] OR DBS[Title/Abstract]))                                              |
| #4  | Search "deep brain stimulation"[MeSH Terms]                                                                                                                                                                                                                                                                                                                                                                                                                                                        |
| #5  | Search ((Duodopa[Title/Abstract] OR duopa[Title/Abstract] OR lcig[Title/Abstract]))                                                                                                                                                                                                                                                                                                                                                                                                                |
| #6  | Search ((levodopa[Title/Abstract] OR "l dopa"[Title/Abstract] OR "levo dopa"[Title/Abstract] OR levocarb[Title/Abstract] OR levodopacarbido[Title/Abstract] OR lcig[Title/Abstract] OR "carbidopa plus levodopa"[Title/Abstract] OR "levodopa plus carbidopa"[Title/Abstract] OR "carbidopa levodopa"[Title/Abstract] OR "L dopa carbidopa"[Title/Abstract] OR "levodopa carbidopa"[Title/Abstract] OR "levo dopa carbidopa"[Title/Abstract] OR DUODOPA[Title/Abstract] OR duopa[Title/Abstract])) |
| #7  | Search (((intestin*[Title/Abstract] AND (gel[Title/Abstract] OR gels[Title/Abstract] OR infus*))[Title/Abstract] OR "enteral suspension"[Title/Abstract] OR "enteral suspensions"[Title/Abstract] OR "intestinal gel"[Title/Abstract] OR "intestinal gels"[Title/Abstract] OR intestin*[Title/Abstract]))                                                                                                                                                                                          |
| #8  | Search (("CSAI"[Title/Abstract] OR (apomorphine AND (subcutaneous* OR infusion* OR continuous)))[Title/Abstract]))                                                                                                                                                                                                                                                                                                                                                                                 |
| #9  | Search ((apomorphine[Title/Abstract] AND subcutaneous*[Title/Abstract]))                                                                                                                                                                                                                                                                                                                                                                                                                           |
| #10 | Search ((apomorphine[Title/Abstract] AND infusion*[Title/Abstract]))                                                                                                                                                                                                                                                                                                                                                                                                                               |
| #11 | Search ((apomorphine[Title/Abstract] AND continuous[Title/Abstract]))                                                                                                                                                                                                                                                                                                                                                                                                                              |
| #12 | Search (#1 or #2)                                                                                                                                                                                                                                                                                                                                                                                                                                                                                  |
| #13 | Search (#3 or #4 or #5 or (#6 and #7) or #9 or #10 OR #11)                                                                                                                                                                                                                                                                                                                                                                                                                                         |
| #14 | Search ((efficacy[Title/Abstract] OR efficacious*[Title/Abstract] OR effective*[Title/Abstract] OR "therapeutic effect"[Title/Abstract] OR "desired effect"[Title/Abstract] OR "therapeutic effects"[Title/Abstract] OR "desired effects"[Title/Abstract]))                                                                                                                                                                                                                                        |
| #15 | Search "activities of daily living"[MeSH Terms]                                                                                                                                                                                                                                                                                                                                                                                                                                                    |
| #16 | Search ((ADL[Title/Abstract] OR ((activity[Title/Abstract] OR activities)[Title/Abstract] AND daily)[Title/Abstract] AND ((life[Title/Abstract] OR living)[Title/Abstract])) OR (chronic[Title/Abstract] AND limit*[Title/Abstract] AND (activity[Title/Abstract] OR activities[Title/Abstract]))                                                                                                                                                                                                  |
| #17 | Search (((longterm[Title/Abstract] OR "long term"[Title/Abstract] OR long-term[Title/Abstract])) OR (outcome[Title/Abstract] OR outcomes[Title/Abstract] OR out-come[Title/Abstract] OR out-comes[Title/Abstract] OR "out come"[Title/Abstract] OR "out comes"[Title/Abstract])) OR (unmet[Title/Abstract] OR "not met"[Title/Abstract] OR "not meet"[Title/Abstract] OR (meet*[Title/Abstract] AND (need[Title/Abstract] OR needs))[Title/Abstract]))                                             |
| #18 | Search "parkinson disease"[MeSH Major Topic]                                                                                                                                                                                                                                                                                                                                                                                                                                                       |
| #19 | Search (#14 or #15 or #16)                                                                                                                                                                                                                                                                                                                                                                                                                                                                         |
| #20 | Search (#12 and #13 and #19)                                                                                                                                                                                                                                                                                                                                                                                                                                                                       |
| #21 | Search (#20 and #18)                                                                                                                                                                                                                                                                                                                                                                                                                                                                               |
| #22 | Search (#21 and #17)                                                                                                                                                                                                                                                                                                                                                                                                                                                                               |

|     |                                                                                               |
|-----|-----------------------------------------------------------------------------------------------|
| #23 | Search (#21 and #17) Filters: Humans                                                          |
| #24 | Search (#21 and #17) Filters: Humans; English                                                 |
| #25 | Search (#21 and #17) Filters: Publication date from 2016/12/31 to 2019/06/13; Humans; English |

Search strategy for the BIOSIS Previews, Derwent Drug File, Embase, International Pharmaceutical Abstracts, Medline, and SciSearch databases

| Search # | Search Term                                                                                                                                                                                                                                                                                                                                                                            |
|----------|----------------------------------------------------------------------------------------------------------------------------------------------------------------------------------------------------------------------------------------------------------------------------------------------------------------------------------------------------------------------------------------|
| #1       | Parkinson* OR "paralysis agitans" OR "Parkinson's"                                                                                                                                                                                                                                                                                                                                     |
| #2       | MESH.EXACT("Parkinson Disease") OR EMB.EXACT("Parkinson disease") OR su("parkinson disease" OR "parkinson's disease")                                                                                                                                                                                                                                                                  |
| #3       | "brain excitation" OR "brain stimulation" OR "brain stimulus" OR "deep brain stimulation" OR "electrical brain stimulation" OR "excitation,brain" OR "brain depth stimulation" OR "Brain Stimulation, Deep" OR ("Electrical Stimulation" N/3 Brain) OR DBS                                                                                                                             |
| #4       | EMB.EXACT("brain depth stimulation") OR MESH.EXACT("Deep Brain Stimulation") OR SU("brain depth stimulation" or "deep brain stimulation")                                                                                                                                                                                                                                              |
| #5       | Duodopa or duopa or lcig                                                                                                                                                                                                                                                                                                                                                               |
| #6       | ("atamet" OR "nacom" OR "sinemet") N/3 ((intestinal near/2 gel*) or gel* or " enteral suspension*" or "intestinal gel**")                                                                                                                                                                                                                                                              |
| #7       | (levodopa or "l dopa" or "levo dopa" or levocarb or levodopacarbidoa or lcig or "carbidopa plus levodopa" or "levodopa plus carbidopa" OR "carbidopa levodopa" OR "L dopa carbidopa" OR "levodopa carbidopa" or "levo dopa carbidopa" OR DUODOPA or duopa) N/3 (([*]intestin[*] N/2 (gel* or gel or gels or infus[*4])) OR " enteral suspension*" or "intestinal gel**" OR *intestin*) |
| #8       | EMB.EXACT("carbidopa plus levodopa") OR SU,subst("carbidopa plus levodopa" or "levodopa plus carbidopa")                                                                                                                                                                                                                                                                               |
| #9       | "CSAI" or (continuous N/3 ("sub q" OR subcutaneous[*2] OR "sub cutaneous[*2]" or SC OR sq OR "sub cu" OR subq OR subcut*) N/3 apomorphine N/3 infusion[*1])                                                                                                                                                                                                                            |
| #10      | ab,tio,if(s1) and s2                                                                                                                                                                                                                                                                                                                                                                   |
| #11      | (ab,tio,if(s3) and s4) or (ab,tio,if,subst(s5 or s6 or s7) and s8) and ab,tio,if,subst,su(s9)                                                                                                                                                                                                                                                                                          |
| #12      | (efficacy or efficacious[*4] or effective[*4] or "therapeutic effect[*1]" or "desired effect[*1]")                                                                                                                                                                                                                                                                                     |
| #13      | EMB.EXACT.EXPLODE("drug efficacy") OR MESH.EXACT.EXPLODE("Treatment Outcome") OR (su("Treatment Outcome") OR su((drug OR therapy OR treatment) p/1 efficacy))                                                                                                                                                                                                                          |
| #14      | ADL or (activit[*3] N/3 daily N/3 (living or life)) or (chronic N/3 limit[*6] N/3 activit[*3])                                                                                                                                                                                                                                                                                         |
| #15      | EMB.EXACT("daily life activity") OR MESH.EXACT.EXPLODE("Activities of Daily Living") OR MESH.EXACT("Activities of Daily Living") OR SU("daily life activit[*3]" or "activit[*3] of daily living")                                                                                                                                                                                      |
| #16      | (ab,tio,if(s12) and s13) or (ab,tio,if(s14) or s15)                                                                                                                                                                                                                                                                                                                                    |
| #17      | s10 and s11 and s16                                                                                                                                                                                                                                                                                                                                                                    |
| #18      | (pd(20170101-20190607) or ud(20170101-20190607)) and (py(2017-2019) or yr(2017-2019))                                                                                                                                                                                                                                                                                                  |
| #19      | s17 and s18                                                                                                                                                                                                                                                                                                                                                                            |

|     |                                                                                                                              |
|-----|------------------------------------------------------------------------------------------------------------------------------|
| #20 | ab,tio(("long term" or "long-term" or longterm) N/5 s12)                                                                     |
| #21 | ab,tio((outcome[*1] or "out come[*1]" or "out-come[*1]") N/5 s14)                                                            |
| #22 | s19 and (s20 or s21)                                                                                                         |
| #23 | s19 and ab,tio((unmet or "not met" or ("not" N/3 meet[*3])) N/3 need[*1])                                                    |
| #24 | s19 and tio(s1) and tio(s3 or s5 or s6 or s7 or s9)                                                                          |
| #25 | s19 and tio(s3 or s5 or s6 or s7 or s9) and tio(s12 or s14)                                                                  |
| #26 | s22 or s23 or s24 or s25                                                                                                     |
| #27 | s26 and la(English)                                                                                                          |
| #28 | s27 and (human(yes) or su(human or humans) or mesh(humans) or emb(human) or ab,tio(patient[*1]))                             |
| #29 | MJMESH.EXACT("Parkinson Disease") OR MJEMB.EXACT("Parkinson disease") OR MJSUB("parkinson disease" OR "parkinson's disease") |
| #30 | s28 and s29                                                                                                                  |



**Supplementary Table 2** Inconsistency model results [1]

**A. Off time**

| Treatments                            |      | Consistency model |                  | Inconsistency model |                  |
|---------------------------------------|------|-------------------|------------------|---------------------|------------------|
|                                       |      | Mean              | 95% CrI          | Mean                | 95% CrI          |
| LCIG                                  | BMT  | 2.253             | (1.323, 3.185)   | 1.312               | (-0.041, 2.662)  |
| LCIG                                  | CSAI | 1.352             | (0.111, 2.597)   | 2.183               | (0.487, 3.880)   |
| LCIG                                  | DBS  | -0.095            | (-0.977, 0.791)  | 0.228               | (-0.864, 1.324)  |
| BMT                                   | CSAI | -0.902            | (-1.883, 0.081)  | -1.893              | (-3.159, -0.626) |
| BMT                                   | DBS  | -2.348            | (-3.035, -1.662) | -2.501              | (-3.248, -1.755) |
| CSAI                                  | DBS  | -1.446            | (-2.606, -0.289) | 0.314               | (-195.3, 195.8)  |
| Posterior mean of residual difference |      | 19.1              |                  | 13.1                |                  |
| DIC                                   |      | 28.5              |                  | 24.5                |                  |

Although the inconsistency model has a lower posterior mean of the residual difference and hence is a better fit to the data, the difference in DIC between the two models is less than 5. Note that a difference in DIC over 5 is important to choose one model over the other [1]. In addition, the 95% credible intervals from the two models overlap for all comparisons.

**B. PDQ**

| Treatments                            |      | Consistency model |                  | Inconsistency model |                 |
|---------------------------------------|------|-------------------|------------------|---------------------|-----------------|
|                                       |      | Mean              | 95% CrI          | Mean                | 95% CrI         |
| LCIG                                  | BMT  | 7.482             | (4.809, 10.150)  | 4.134               | (-0.633, 8.915) |
| LCIG                                  | CSAI | 4.094             | (1.647, 6.534)   | 3.915               | (1.285, 6.551)  |
| LCIG                                  | DBS  | 0.011             | (-2.233, 2.251)  | 0.477               | (-1.902, 2.861) |
| BMT                                   | CSAI | -3.388            | (-6.447, -0.332) | -2.481              | (-7.620, 2.663) |
| BMT                                   | DBS  | -7.472            | (-9.329, -5.614) | -8.483              | (-10.61, 6.353) |
| CSAI                                  | DBS  | -4.083            | (-6.949, -1.215) | 0.314               | (-195.3, 195.8) |
| Posterior mean of residual difference |      | 48.2              |                  | 46.4                |                 |
| DIC                                   |      | 122.9             |                  | 123.1               |                 |

Although the inconsistency model has a lower posterior mean of the residual difference and hence is a better fit to the data, the difference in DIC between the two models is less than 1. Note that a difference in DIC over 5 is important to choose one model over the other [1]. In addition, the 95% credible intervals from the two models overlap for all comparisons.

BMT, best medical therapy; CrI, credible intervals; CSAI, continuous subcutaneous apomorphine infusion; DBS, deep brain stimulation; DIC, deviance information criterion; LCIG, levodopa/carbidopa intestinal gel

**Supplementary Fig 1** Networks after MAIC. (a) for off-time [2-11]; (b) for PDQ-8/PDQ-39 [2, 4, 5, 7-9, 11-20]

a

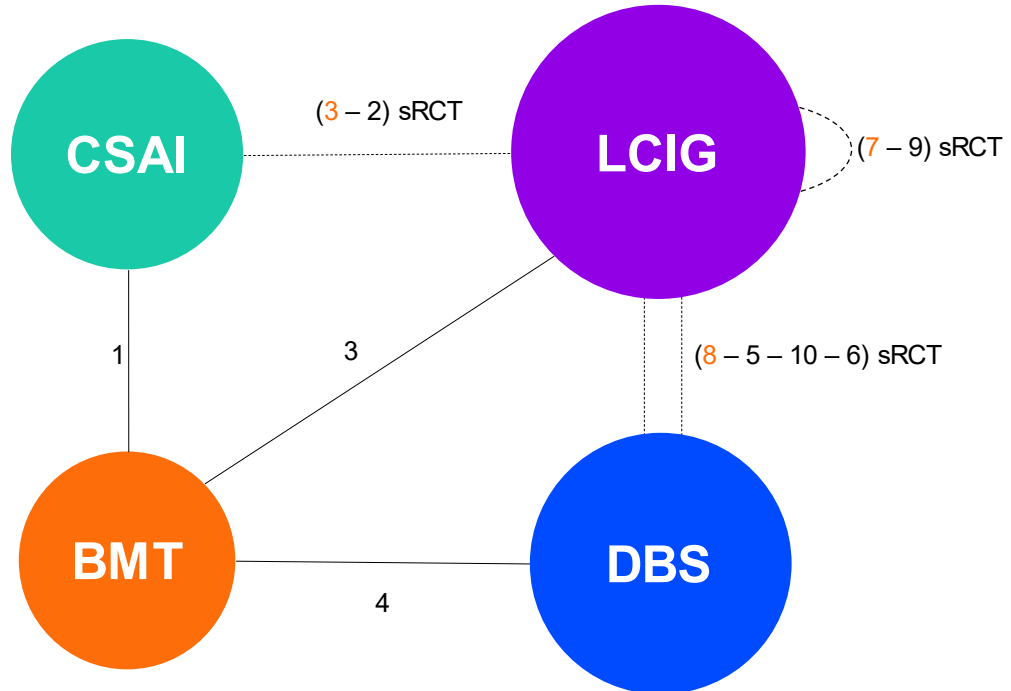

b

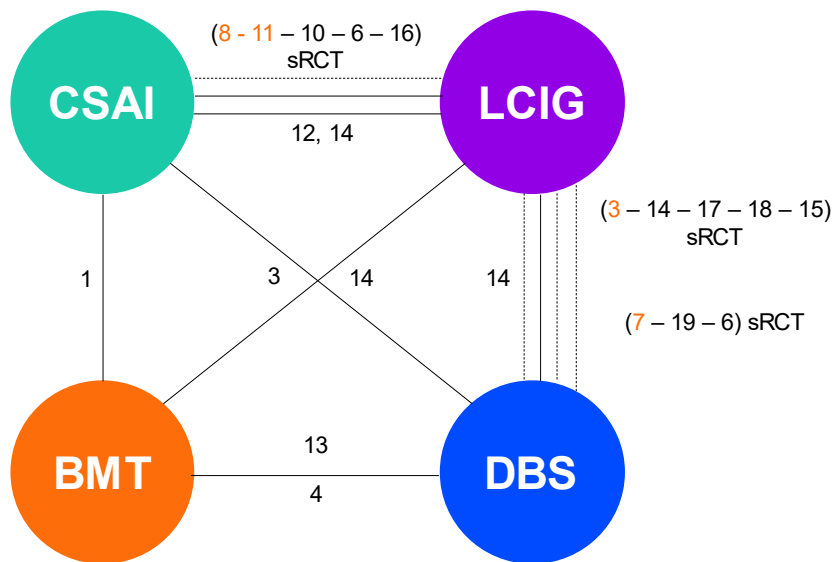

Orange text = individual patient data study. Black text = aggregate data study. Solid line = existing study. Dashed line = simulated study (sRCT). Numbers relate to reference list.  
BMT, best medical therapy; DBS, deep brain stimulation; CSAI, continuous subcutaneous apomorphine infusion; LCIG, levodopa/carbidopa intestinal gel; sRCT, simulated randomized controlled study

**Supplementary Fig 2** Risk of bias assessment of RCTs [2, 4, 5, 14, 21]

|                                                                          | Studies               |                         |                               |                       |
|--------------------------------------------------------------------------|-----------------------|-------------------------|-------------------------------|-----------------------|
|                                                                          | Olanow et al 2014 [3] | Deuschl et al 2006 [13] | Katzenschlager et al 2018 [1] | Weaver et al 2009 [4] |
| <b>Selection bias</b><br><i>Random sequence generation</i>               | +                     | +                       | +                             | +                     |
| <b>Selection bias</b><br><i>Allocation concealment</i>                   | +                     | X                       | +                             | ?                     |
| <b>Performance bias</b><br><i>Blinding of participants and personnel</i> | +                     | +                       | +                             | +                     |
| <b>Detection bias</b><br><i>Blinding of outcome assessment</i>           | ?                     | X                       | +                             | +                     |
| <b>Attrition bias</b><br><i>Incomplete outcome data</i>                  | +                     | +                       | X                             | +                     |
| <b>Reporting bias</b><br><i>Selective reporting</i>                      | +                     | +                       | X                             | +                     |
| <b>Other bias<sup>a</sup></b><br><i>Other sources of bias</i>            | X                     | +                       | +                             | +                     |
| <b>OVERALL RoB ASSESSMENT</b>                                            | High                  | High                    | High                          | Some concerns         |

RoB, risk of bias. RCT, randomized controlled trial.

<sup>a</sup>Other sources of bias that were considered included whether the study had an intention-to-treat analysis, and if so, whether this was appropriate and whether appropriate methods were used to account for missing data.

**Supplementary Fig 3** Risk of bias assessment of non-randomized cohort studies [13, 15, 22]

| Judgment                                                  | Studies                     |                                    |
|-----------------------------------------------------------|-----------------------------|------------------------------------|
|                                                           | Dafsaari et al<br>2019 [30] | Martinez-Martin et al<br>2015 [38] |
| Critical                                                  |                             |                                    |
| Serious                                                   |                             |                                    |
| Moderate                                                  |                             |                                    |
| Low                                                       |                             |                                    |
| No information                                            |                             |                                    |
| <b>Bias due to confounding</b>                            |                             |                                    |
| <b>Bias in selection of participants into the study</b>   |                             |                                    |
| <b>Bias in classification of interventions</b>            |                             |                                    |
| <b>Bias due to deviations from intended interventions</b> |                             |                                    |
| <b>Bias due to missing data</b>                           |                             |                                    |
| <b>Bias in measurement of outcomes</b>                    |                             |                                    |
| <b>Bias in selection of the reported result</b>           |                             |                                    |
| <b>OVERALL RoB ASSESSMENT</b>                             |                             |                                    |

RoB, risk of bias.

**Supplementary Fig 4** Risk of bias assessment of single-arm studies [3, 6-12, 16-20, 23-26]

|                                                                                                                                                                                                                         | Judgment                                                                               |                                                                                        |                                                                                        |                                                                                     | Studies                                                                             |                                                                                     |                                                                                     |                                                                                     |                                                                                     |                                                                                      |                                                                                       |                                                                                       |                                                                                       |                                                                                       |                                                                                       |                                                                                       |                                                                                       |                                                                                       |                                                                                       |                                                                                       |                                                                                       |                                                                                       |                                                                                       |                                                                                       |                                                                                       |    |
|-------------------------------------------------------------------------------------------------------------------------------------------------------------------------------------------------------------------------|----------------------------------------------------------------------------------------|----------------------------------------------------------------------------------------|----------------------------------------------------------------------------------------|-------------------------------------------------------------------------------------|-------------------------------------------------------------------------------------|-------------------------------------------------------------------------------------|-------------------------------------------------------------------------------------|-------------------------------------------------------------------------------------|-------------------------------------------------------------------------------------|--------------------------------------------------------------------------------------|---------------------------------------------------------------------------------------|---------------------------------------------------------------------------------------|---------------------------------------------------------------------------------------|---------------------------------------------------------------------------------------|---------------------------------------------------------------------------------------|---------------------------------------------------------------------------------------|---------------------------------------------------------------------------------------|---------------------------------------------------------------------------------------|---------------------------------------------------------------------------------------|---------------------------------------------------------------------------------------|---------------------------------------------------------------------------------------|---------------------------------------------------------------------------------------|---------------------------------------------------------------------------------------|---------------------------------------------------------------------------------------|---------------------------------------------------------------------------------------|----|
|                                                                                                                                                                                                                         |  Poor |  Fair |  Good |                                                                                     | N                                                                                   | Y                                                                                   | CD                                                                                  | NA                                                                                  | NR                                                                                  | Antonini et al 2017 [22]                                                             | Fernandez et al 2015 [20]                                                             | Palhagen et al 2016 [21]                                                              | Borgemeester & van Laar 2017 [28]                                                     | Dafsari et al 2016 [43]                                                               | Dafsari et al 2018 [29]                                                               | De Fabregues et al 2017 [31]                                                          | Drapier et al 2016 [33]                                                               | Floden et al 2015 [34]                                                                | Honig et al 2009 [35]                                                                 | Kubu et al 2017 [36]                                                                  | Li et al 2017 [37]                                                                    | Murata et al 2016 [39]                                                                | Soulas et al 2011 [40]                                                                | Timmermann et al 2015 [41]                                                            | Vijjaratanam et al 2018 [42]                                                          |    |
| Was the study question or objective clearly stated?                                                                                                                                                                     | Y                                                                                      | Y                                                                                      | Y                                                                                      | Y                                                                                   | Y                                                                                   | Y                                                                                   | Y                                                                                   | Y                                                                                   | Y                                                                                   | Y                                                                                    | Y                                                                                     | Y                                                                                     | Y                                                                                     | Y                                                                                     | Y                                                                                     | Y                                                                                     | Y                                                                                     | Y                                                                                     | Y                                                                                     | Y                                                                                     | Y                                                                                     | Y                                                                                     | Y                                                                                     | Y                                                                                     | Y                                                                                     | Y  |
| Were eligibility/selection criteria for the study population prespecified and clearly described?                                                                                                                        | Y                                                                                      | Y                                                                                      | N                                                                                      | N                                                                                   | Y                                                                                   | Y                                                                                   | Y                                                                                   | Y                                                                                   | Y                                                                                   | Y                                                                                    | Y                                                                                     | Y                                                                                     | Y                                                                                     | Y                                                                                     | Y                                                                                     | Y                                                                                     | Y                                                                                     | Y                                                                                     | Y                                                                                     | Y                                                                                     | Y                                                                                     | Y                                                                                     | Y                                                                                     | Y                                                                                     | Y                                                                                     | Y  |
| Were the participants in the study representative of those who would be eligible for the test/service/intervention in the general or clinical population of interest?                                                   | Y                                                                                      | Y                                                                                      | Y                                                                                      | Y                                                                                   | Y                                                                                   | Y                                                                                   | Y                                                                                   | Y                                                                                   | Y                                                                                   | Y                                                                                    | Y                                                                                     | Y                                                                                     | Y                                                                                     | Y                                                                                     | Y                                                                                     | Y                                                                                     | Y                                                                                     | Y                                                                                     | Y                                                                                     | Y                                                                                     | Y                                                                                     | Y                                                                                     | Y                                                                                     | Y                                                                                     | Y                                                                                     | Y  |
| Were all eligible participants that met the prespecified entry criteria enrolled?                                                                                                                                       | Y                                                                                      | Y                                                                                      | Y                                                                                      | Y                                                                                   | Y                                                                                   | Y                                                                                   | Y                                                                                   | Y                                                                                   | Y                                                                                   | Y                                                                                    | Y                                                                                     | Y                                                                                     | Y                                                                                     | Y                                                                                     | Y                                                                                     | Y                                                                                     | Y                                                                                     | Y                                                                                     | Y                                                                                     | Y                                                                                     | Y                                                                                     | Y                                                                                     | Y                                                                                     | Y                                                                                     | Y                                                                                     | Y  |
| Was the sample size sufficiently large to provide confidence in the findings?                                                                                                                                           | Y                                                                                      | Y                                                                                      | Y                                                                                      | Y                                                                                   | Y                                                                                   | Y                                                                                   | N                                                                                   | Y                                                                                   | Y                                                                                   | N                                                                                    | Y                                                                                     | Y                                                                                     | N                                                                                     | Y                                                                                     | Y                                                                                     | N                                                                                     | Y                                                                                     | Y                                                                                     | Y                                                                                     | Y                                                                                     | Y                                                                                     | Y                                                                                     | Y                                                                                     | Y                                                                                     | Y                                                                                     | Y  |
| Was the test/service/intervention clearly described and delivered consistently across the study population?                                                                                                             | Y                                                                                      | Y                                                                                      | Y                                                                                      | Y                                                                                   | Y                                                                                   | Y                                                                                   | Y                                                                                   | Y                                                                                   | Y                                                                                   | Y                                                                                    | Y                                                                                     | Y                                                                                     | Y                                                                                     | Y                                                                                     | Y                                                                                     | Y                                                                                     | Y                                                                                     | Y                                                                                     | Y                                                                                     | Y                                                                                     | Y                                                                                     | Y                                                                                     | Y                                                                                     | Y                                                                                     | Y                                                                                     | Y  |
| Were the outcome measures prespecified, clearly defined, valid, reliable, and assessed consistently across all study participants?                                                                                      | Y                                                                                      | Y                                                                                      | Y                                                                                      | Y                                                                                   | Y                                                                                   | Y                                                                                   | Y                                                                                   | Y                                                                                   | Y                                                                                   | Y                                                                                    | Y                                                                                     | Y                                                                                     | Y                                                                                     | Y                                                                                     | Y                                                                                     | Y                                                                                     | Y                                                                                     | Y                                                                                     | Y                                                                                     | Y                                                                                     | Y                                                                                     | Y                                                                                     | Y                                                                                     | Y                                                                                     | Y                                                                                     | Y  |
| Were the people assessing the outcomes blinded to the participants' exposures/interventions?                                                                                                                            | N                                                                                      | N                                                                                      | N                                                                                      | N                                                                                   | N                                                                                   | N                                                                                   | N                                                                                   | N                                                                                   | N                                                                                   | N                                                                                    | N                                                                                     | N                                                                                     | N                                                                                     | N                                                                                     | N                                                                                     | N                                                                                     | N                                                                                     | N                                                                                     | N                                                                                     | N                                                                                     | N                                                                                     | N                                                                                     | N                                                                                     | N                                                                                     | N                                                                                     | N  |
| Was the loss to follow-up after baseline 20% or less? Were those lost to follow-up accounted for in the analysis?                                                                                                       | Y                                                                                      | CD                                                                                     | CD                                                                                     | Y                                                                                   | Y                                                                                   | Y                                                                                   | N                                                                                   | Y                                                                                   | Y                                                                                   | Y                                                                                    | Y                                                                                     | Y                                                                                     | Y                                                                                     | Y                                                                                     | Y                                                                                     | Y                                                                                     | Y                                                                                     | Y                                                                                     | Y                                                                                     | Y                                                                                     | Y                                                                                     | Y                                                                                     | Y                                                                                     | Y                                                                                     | Y                                                                                     |    |
| Did the statistical methods examine changes in outcome measures from before to after the intervention? Were statistical tests done that provided p-values for pre-to-post changes?                                      | Y                                                                                      | Y                                                                                      | Y                                                                                      | Y                                                                                   | Y                                                                                   | Y                                                                                   | Y                                                                                   | Y                                                                                   | Y                                                                                   | Y                                                                                    | Y                                                                                     | Y                                                                                     | Y                                                                                     | Y                                                                                     | Y                                                                                     | Y                                                                                     | Y                                                                                     | Y                                                                                     | Y                                                                                     | Y                                                                                     | Y                                                                                     | Y                                                                                     | Y                                                                                     | Y                                                                                     | Y                                                                                     | Y  |
| Were outcome measures of interest taken multiple times before the intervention and multiple times after the intervention (i.e., did they use an interrupted time-series design)?                                        | N                                                                                      | N                                                                                      | N                                                                                      | N                                                                                   | N                                                                                   | N                                                                                   | N                                                                                   | N                                                                                   | N                                                                                   | N                                                                                    | N                                                                                     | N                                                                                     | N                                                                                     | N                                                                                     | N                                                                                     | N                                                                                     | N                                                                                     | N                                                                                     | N                                                                                     | N                                                                                     | N                                                                                     | N                                                                                     | N                                                                                     | N                                                                                     | N                                                                                     | N  |
| If the intervention was conducted at a group level (e.g., a whole hospital, a community, etc.) did the statistical analysis take into account the use of individual-level data to determine effects at the group level? | NA                                                                                     | NA                                                                                     | NA                                                                                     | NA                                                                                  | NA                                                                                  | NA                                                                                  | NA                                                                                  | NA                                                                                  | NA                                                                                  | NA                                                                                   | NA                                                                                    | NA                                                                                    | NA                                                                                    | NA                                                                                    | NA                                                                                    | NA                                                                                    | NA                                                                                    | NA                                                                                    | NA                                                                                    | NA                                                                                    | NA                                                                                    | NA                                                                                    | NA                                                                                    | NA                                                                                    | NA                                                                                    | NA |
| <b>OVERALL RoB ASSESSMENT</b>                                                                                                                                                                                           |     |     |     |  |  |  |  |  |  |  |  |  |  |  |  |  |  |  |  |  |  |  |  |  |  |    |

**Supplementary Fig 5** Risk of bias assessment of: (a) RCTs; (b) non-randomized controlled trials; and (c) single-arm studies [2-22, 24-26]

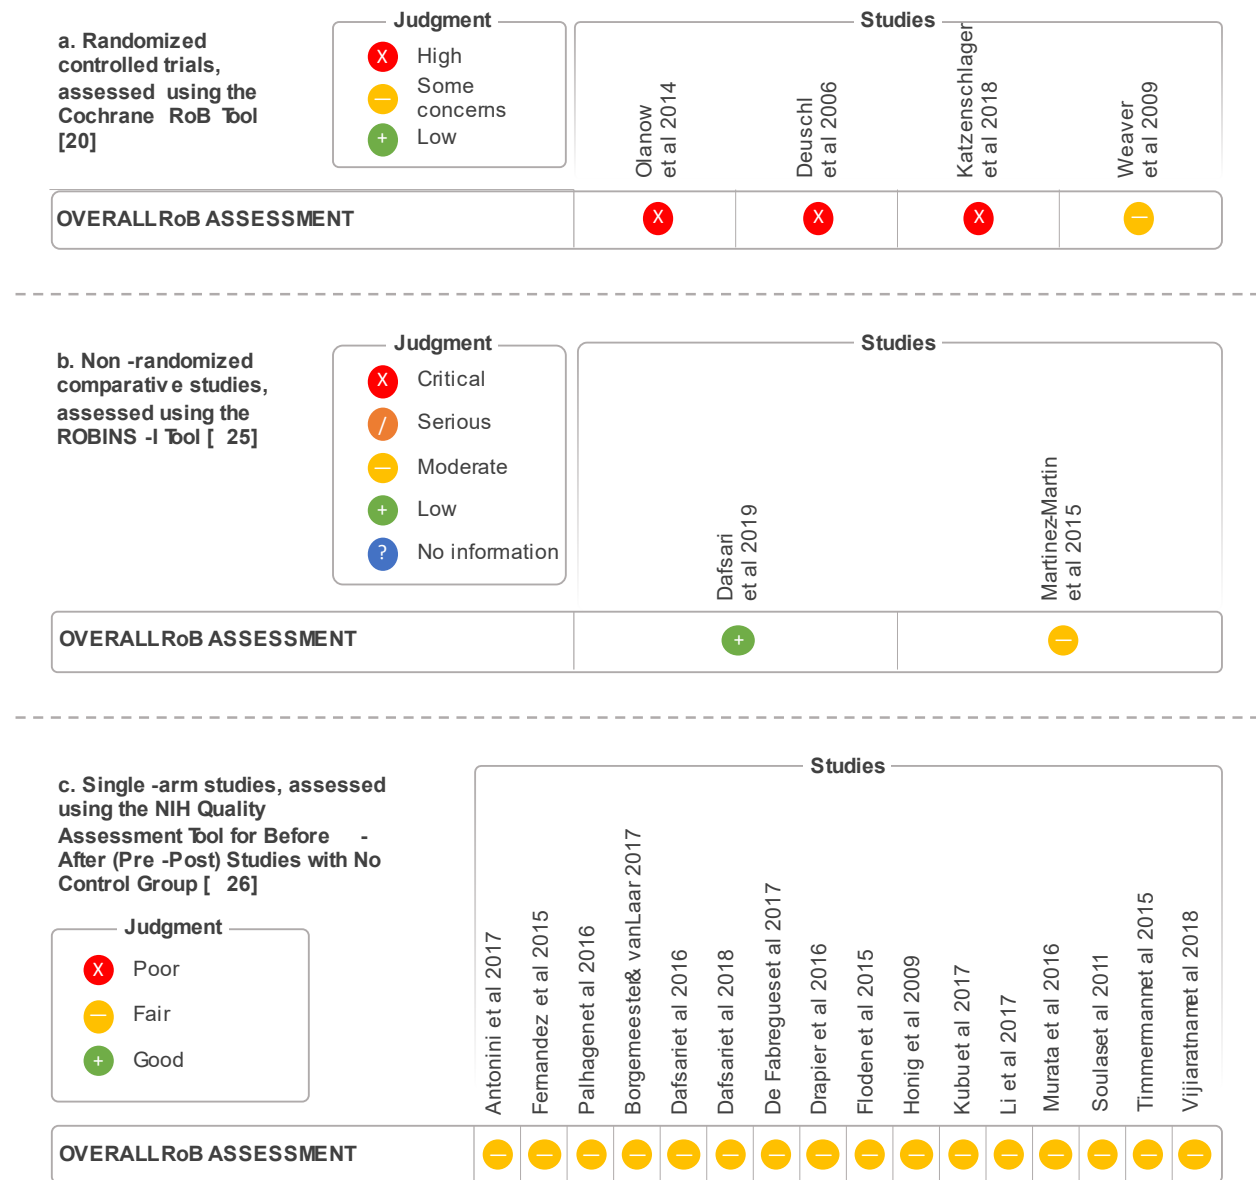

RoB, risk of bias. RCT, randomized controlled trial.

## References for supplementary file

1. MRC Biostatistics Unit. DIC: deviance information criterion; 2015.
2. Katzenschlager R, Poewe W, Rascol O, Trenkwalder C, Deuschl G, Chaudhuri KR, et al. Apomorphine subcutaneous infusion in patients with Parkinson's disease with persistent motor fluctuations (TOLEDO): a multicentre, double-blind, randomised, placebo-controlled trial. *Lancet Neurol.* 2018 Sep;17(9):749-59.
3. Borgemeester RWK, van Laar T. Continuous subcutaneous apomorphine infusion in Parkinson's disease patients with cognitive dysfunction: A retrospective long-term follow-up study. *Parkinsonism Relat Disord.* 2017 Dec;45:33-8.
4. Olanow CW, Kieburtz K, Odin P, Espay AJ, Standaert DG, Fernandez HH, et al. Continuous intrajejunal infusion of levodopa-carbidopa intestinal gel for patients with advanced Parkinson's disease: a randomised, controlled, double-blind, double-dummy study. *Lancet Neurol.* 2014 Feb;13(2):141-9.
5. Weaver FM, Follett K, Stern M, Hur K, Harris C, Marks WJ, Jr., et al. Bilateral deep brain stimulation vs best medical therapy for patients with advanced Parkinson disease: a randomized controlled trial. *Jama.* 2009 Jan 7;301(1):63-73.
6. Li D, Zhang C, Gault J, Wang W, Liu J, Shao M, et al. Remotely programmed deep brain stimulation of the bilateral subthalamic nucleus for the treatment of primary Parkinson disease: a randomized controlled trial investigating the safety and efficacy of a novel deep brain stimulation system. *Stereotact Funct Neurosurg.* 2017;95(3):174-82.
7. Timmermann L, Jain R, Chen L, Maarouf M, Barbe MT, Allert N, et al. Multiple-source current steering in subthalamic nucleus deep brain stimulation for Parkinson's disease (the VANTAGE study): a non-randomised, prospective, multicentre, open-label study. *Lancet Neurol.* 2015 Jul;14(7):693-701.



8. Antonini A, Poewe W, Chaudhuri KR, Jech R, Pickut B, Pirtosek Z, et al. Levodopa-carbidopa intestinal gel in advanced Parkinson's: final results of the GLORIA registry. *Parkinsonism Relat Disord*. 2017 Dec;45:13-20.
9. Fernandez HH, Standaert DG, Hauser RA, Lang AE, Fung VS, Klostermann F, et al. Levodopa-carbidopa intestinal gel in advanced Parkinson's disease: final 12-month, open-label results. *Mov Disord*. 2015 Dec 24;30(4):500-9.
10. De Fabregues O, Dot J, Abu-Suboh M, Hernandez-Vara J, Ferre A, Romero O, et al. Long-term safety and effectiveness of levodopa-carbidopa intestinal gel infusion. *Brain Behav*. 2017 Aug;7(8):e00758.
11. Murata M, Mihara M, Hasegawa K, Jeon BS, Tsai C-H, Yokoyama, et al. Efficacy and safety of levodopa-carbidopa intestinal gel from an open-label study in Japanese, Taiwanese, and Korean patients with advanced Parkinson's disease. *Neurology*. 2016;86(Suppl. 16):P5.362.
12. Drapier S, Eusebio A, Degos B, Verin M, Durif F, Azulay JP, et al. Quality of life in Parkinson's disease improved by apomorphine pump: the OPTIPUMP cohort study. *J Neurol*. 2016 Jun;263(6):1111-9.
13. Martinez-Martin P, Reddy P, Katzenschlager R, Antonini A, Todorova A, Odin P, et al. *EuroInf*: a multicenter comparative observational study of apomorphine and levodopa infusion in Parkinson's disease. *Mov Disord*. 2015 Apr;30(4):510-6.
14. Deuschl G, Schade-Brittinger C, Krack P, Volkmann J, Schafer H, Botzel K, et al. A randomized trial of deep-brain stimulation for Parkinson's disease. *N Engl J Med*. 2006 Aug 31;355(9):896-908.

15. Dafsari HS, Martinez-Martin P, Rizos A, Trost M, Dos Santos Ghilardi MG, Reddy P, et al. EuroInf 2: Subthalamic stimulation, apomorphine, and levodopa infusion in Parkinson's disease. *Mov Disord*. 2019 Mar;34(3):353-65.
16. Palhagen SE, Sydow O, Johansson A, Nyholm D, Holmberg B, Widner H, et al. Levodopa-carbidopa intestinal gel (LCIG) treatment in routine care of patients with advanced Parkinson's disease: An open-label prospective observational study of effectiveness, tolerability and healthcare costs. *Parkinsonism Relat Disord*. 2016 Aug;29:17-23.
17. Honig H, Antonini A, Martinez-Martin P, Forgacs I, Faye GC, Fox T, et al. Intrajejunal levodopa infusion in Parkinson's disease: a pilot multicenter study of effects on nonmotor symptoms and quality of life. *Mov Disord*. 2009 Jul 30;24(10):1468-74.
18. Floden D, Busch RM, Cooper SE, Kubu CS, Machado AG. Global cognitive scores do not predict outcome after subthalamic nucleus deep brain stimulation. *Mov Disord*. 2015 Aug;30(9):1279-83.
19. Kubu CS, Cooper SE, Machado A, Frazier T, Vitek J, Ford PJ. Insights gleaned by measuring patients' stated goals for DBS: More than tremor. *Neurology*. 2017 Jan 10;88(2):124-30.
20. Soulas T, Sultan S, Gurruchaga JM, Palfi S, Fenelon G. Depression and coping as predictors of change after deep brain stimulation in Parkinson's disease. *World Neurosurg*. 2011 Mar-Apr;75(3-4):525-32.
21. Higgins JPT, Altman DG, Gøtzsche PC, Jüni P, Moher D, Oxman AD, et al. The Cochrane Collaboration's tool for assessing risk of bias in randomised trials. *BMJ*. 2011;343:d5928.

22. Sterne JAC, Hernán MA, McAleenan A, Reeves BC, Higgins JPT. Chapter 25: Assessing risk of bias in a non-randomized study. In: Higgins JPT, Thomas J, Chandler J, Cumpston M, Li T, Page MJ, Welch VA (editors). Cochrane Handbook for Systematic Reviews of Interventions version 6.3 (updated February 2022). Cochrane, 2022. Available from [www.training.cochrane.org/handbook](http://www.training.cochrane.org/handbook).
23. Study Quality Assessment Tools. NIH. <https://www.nhlbi.nih.gov/health-topics/study-quality-assessment-tools>. 2021. Accessed June 2022.
24. Dafsari HS, Reddy P, Herchenbach C, Wawro S, Petry-Schmelzer JN, Visser-Vandewalle V, et al. Beneficial effects of bilateral subthalamic stimulation on non-motor symptoms in Parkinson's disease. Brain Stimul. 2016 Jan-Feb;9(1):78-85.
25. Dafsari HS, Silverdale M, Strack M, Rizos A, Ashkan K, Mahlstedt P, et al. Nonmotor symptoms evolution during 24 months of bilateral subthalamic stimulation in Parkinson's disease. Mov Disord. 2018 Mar;33(3):421-30.
26. Vijjaratnam N, Hewer S, Varley S, Paul E, Bertram KL, Lee W, et al. Levodopa-carbidopa intestinal gel: is the naso-jejunal phase a redundant convention? Internal medicine journal. 2018 Apr;48(4):469-71.
